# Supplementary material for: Circulating exosomes potentiate tumor malignant properties in a mouse model of chronic sleep fragmentation
Source: PubMed Central journal article supplement (PMC5342372; doi:10.18632/oncotarget.10578), 2016-07-13
Supplement: oncotarget-07-54676-s001.pdf [file oncotarget-07-54676-s001.pdf]

# Circulating exosomes potentiate tumor malignant properties in a mouse model of chronic sleep fragmentation

## Supplementary Materials

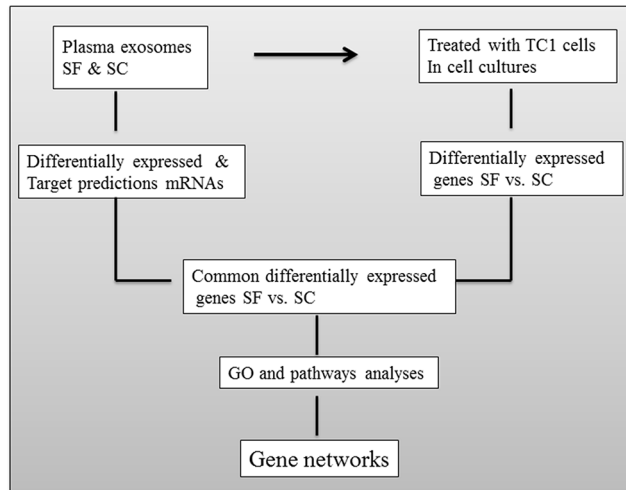

Supplementary Figure S1: Diagram illustrates the integration of miRNA target predictions and differentially expressed mRNAs genes identified in TC1 cells.

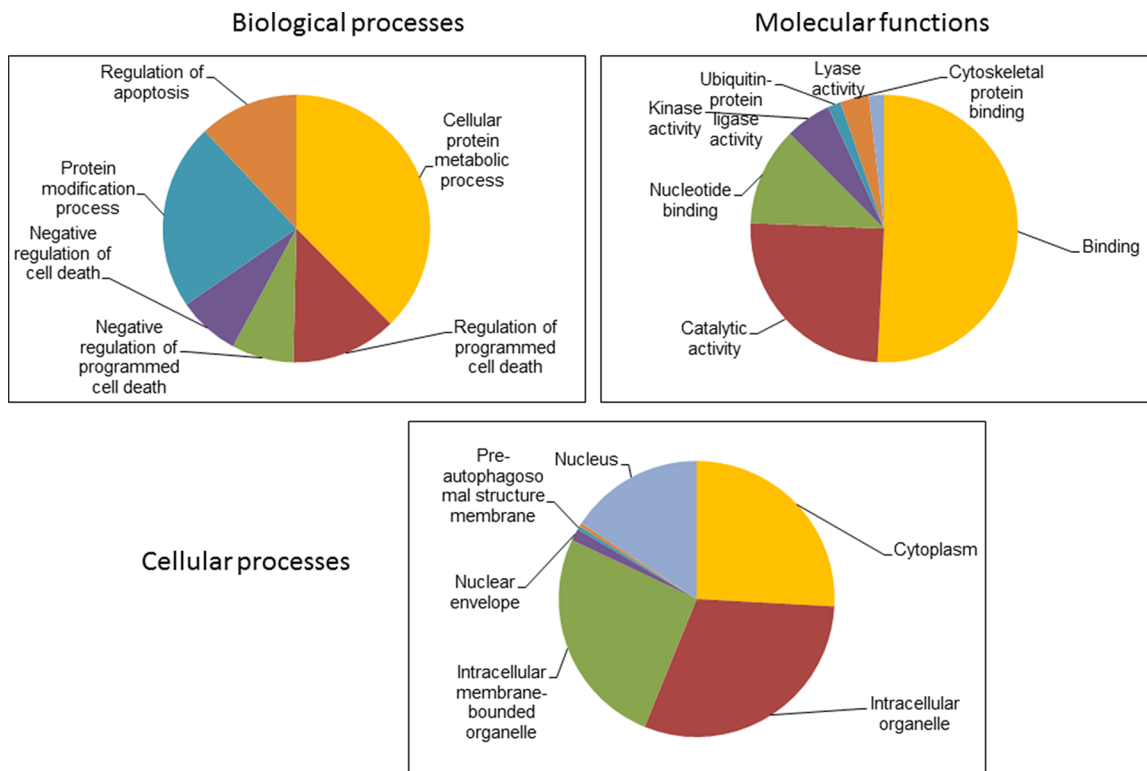

Supplementary Figure S2: Gene ontology of the integrated miRNA target predictions and differentially expressed mRNAs in TC1 cells after treatment with SF or SC-derived plasma exosomes, and include biological processes, molecular functions, and cellular components.

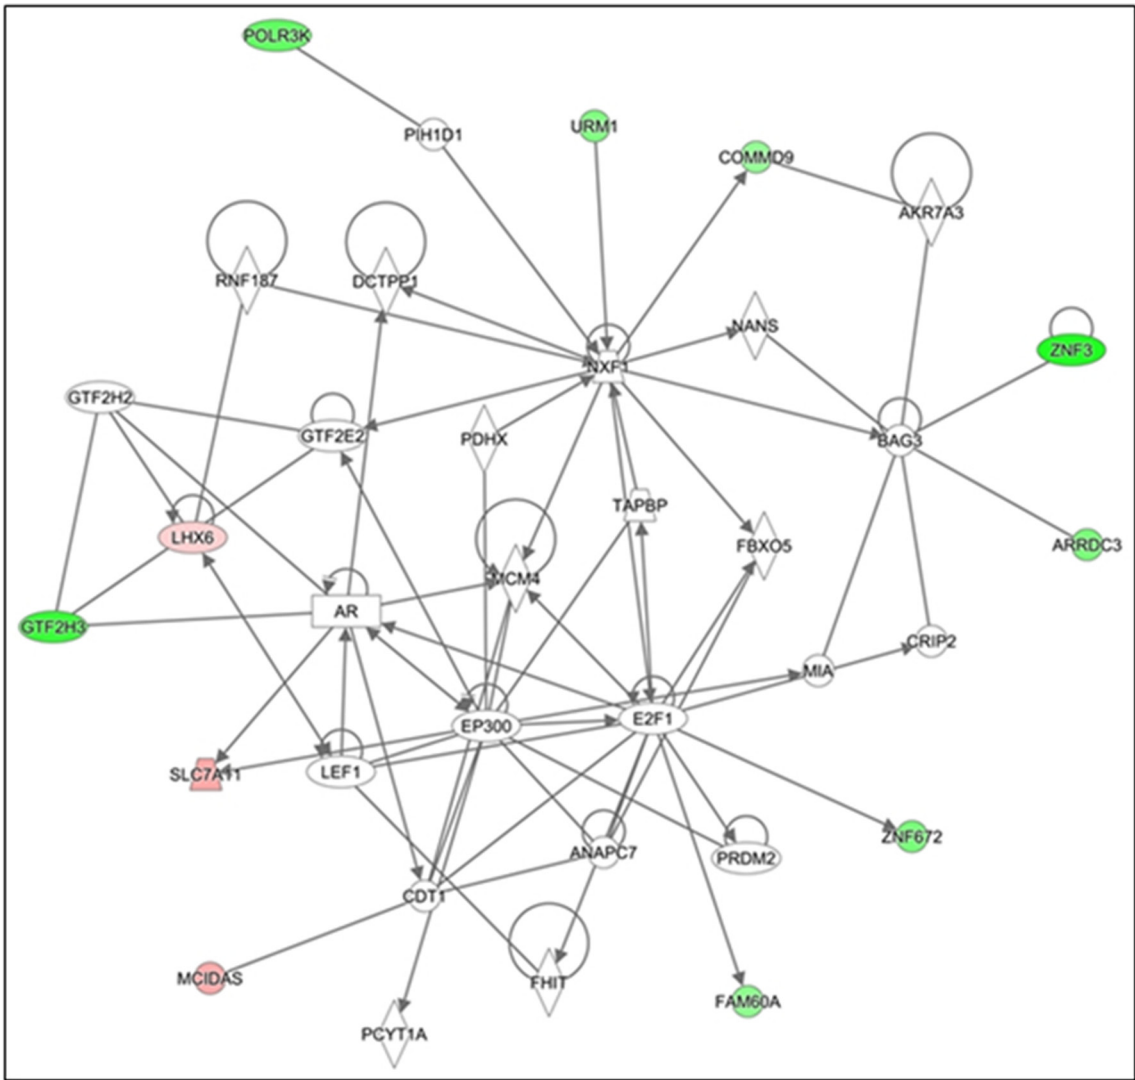

Supplementary Figure S3: Ingenuity pathway analysis illustrating networks derived from cell cycle, reproductive system development and function, and cancer.

**Supplementary Table S1: List of the top 50 highly significant differentially expressed mRNA genes identified after TC1 cell treatment with exosomes from SF(-) and SC(-). See Supplementary Table S1**

**Supplementary Table S2: List of KEGG potential pathways identified in TC1 cells after treatment with SF(-) and SC(-)-derived plasma exosomes**

| Number | Term                                               | # of genes | Percentage | p-value    |
|--------|----------------------------------------------------|------------|------------|------------|
| 1      | mmu04110:Cell cycle                                | 35         | 1.36       | 1.43E-06   |
| 2      | mmu03040:Spliceosome                               | 30         | 1.17       | 1.11E-04   |
| 3      | mmu04130:SNARE interactions in vesicular transport | 13         | 0.51       | 7.41E-04   |
| 4      | mmu00240:Pyrimidine metabolism                     | 23         | 0.90       | 9.78E-04   |
| 5      | mmu00010:Glycolysis/Gluconeogenesis                | 18         | 0.70       | 0.00131123 |
| 6      | mmu00030:Penose phosphate pathway                  | 10         | 0.39       | 0.00165021 |
| 7      | mmu05215:Prostate cancer                           | 21         | 0.82       | 0.00242472 |
| 8      | mmu03420:Nucleotide excision repair                | 13         | 0.51       | 0.00245184 |
| 9      | mmu05214:Glioma                                    | 16         | 0.62       | 0.00481913 |
| 10     | mmu04150:mTOR signaling pathway                    | 14         | 0.55       | 0.00664147 |
| 11     | mmu00052:Galactose metabolism                      | 9          | 0.35       | 0.00863724 |
| 12     | mmu05016:Huntington's disease                      | 33         | 1.29       | 0.0089163  |
| 13     | mmu03410:Base excision repair                      | 11         | 0.43       | 0.01255821 |
| 14     | mmu05218:Melanoma                                  | 16         | 0.62       | 0.01297079 |
| 15     | mmu03030:DNA replication                           | 10         | 0.39       | 0.01456424 |
| 16     | mmu00230:Purine metabolism                         | 28         | 1.09       | 0.01905853 |
| 17     | mmu04623:Cytosolic DNA-sensing pathway             | 13         | 0.51       | 0.01951976 |
| 18     | mmu04120:Ubiquitin mediated proteolysis            | 25         | 0.97       | 0.01957169 |
| 19     | mmu00190:Oxidative phosphorylation                 | 24         | 0.94       | 0.02138265 |
| 20     | mmu05211:Renal cell carcinoma                      | 15         | 0.58       | 0.02528799 |
| 21     | mmu05222:Small cell lung cancer                    | 17         | 0.66       | 0.02983224 |
| 22     | mmu04730:Long-term depression                      | 15         | 0.58       | 0.03159643 |
| 23     | mmu05210:Colorectal cancer                         | 17         | 0.66       | 0.03292027 |
| 24     | mmu04210:Apoptosis                                 | 17         | 0.66       | 0.03623648 |
| 25     | mmu03018:RNA degradation                           | 13         | 0.51       | 0.0367422  |
| 26     | mmu00620:Pyruvate metabolism                       | 10         | 0.39       | 0.03892475 |
| 27     | mmu05200:Pathways in cancer                        | 48         | 1.87       | 0.04656503 |
| 28     | mmu05220:Chronic myeloid leukemia                  | 15         | 0.58       | 0.04751684 |
| 29     | mmu03450:Non-homologous end-joining                | 5          | 0.19       | 0.05023931 |
| 30     | mmu04010:MAPK signaling pathway                    | 40         | 1.56       | 0.05010035 |

Results show the number of differentially expressed genes (DEGs) in every pathway.

**Supplementary Table S3: Differentially expressed plasma exosomal miRNAs in SF(-) and their target genes in TC1 cells**

| miRNAs       | miRNA expression | EntrezGeneID | GeneSymbol | Log fold change | P Value | Microarray FDR-p-value |
|--------------|------------------|--------------|------------|-----------------|---------|------------------------|
| mmu-miR-5112 | up-regulated     | 105171       | Arrdc3     | -0.23           | 0.0002  | 0.040                  |
|              |                  | 207921       | Fam228b    | -0.29           | 0.0005  | 0.048                  |
| mmu-miR-5128 | down-regulated   | 17769        | Mthfr      | 0.24            | 4E-05   | 0.023                  |
| mmu-miR-6366 | down-regulated   | 228026       | Pdk1       | 0.385           | 0.0002  | 0.040                  |
|              |                  | 102098       | Arhgef18   | 0.216           | 0.0002  | 0.040                  |
|              |                  | 67749        | Mgarp      | 0.734           | 0.0002  | 0.041                  |
|              |                  | 214952       | Rhot2      | 0.199           | 0.0004  | 0.045                  |
|              |                  | 14235        | Foxm1      | 0.206           | 0.0005  | 0.047                  |

**Supplementary Table S4: List of transcription factors identified in integrated miRNA gene target predictions and actual differentially expressed genes (DEGs) in TC1 cells treated with exosomes from either SF(-) or SC(-)-derived plasma exosomes**

|              | TF      | Ensemble ID        | Gene Name                                                        |
|--------------|---------|--------------------|------------------------------------------------------------------|
| mmu-miR-5128 | Cdip1   | ENSMUSG00000004071 | cell death inducing Trp53 target 1                               |
|              | Lhx6    | ENSMUSG00000026890 | LIM homeobox protein 6                                           |
|              | Rreb1   | ENSMUSG00000039087 | ras responsive element binding protein 1                         |
|              | Zfp94   | ENSMUSG00000074282 | zinc finger protein 94                                           |
| mmu-miR-5112 | Arid3a  | ENSMUSG00000019564 | AT rich interactive domain 3A                                    |
|              | Bhlhe41 | ENSMUSG00000030256 | basic helix-loop-helix family, member e41                        |
|              | Csde1   | ENSMUSG00000068823 | cold shock domain containing E1, RNA binding                     |
|              | Elf1    | ENSMUSG00000036461 | E74-like factor 1                                                |
|              | Lef1    | ENSMUSG00000027985 | lymphoid enhancer binding factor 1                               |
|              | Maff    | ENSMUSG00000042622 | v-maf musculoaponeurotic fibrosarcoma oncogene family, protein F |
|              | Rela    | ENSMUSG00000024927 | v-rel reticuloendotheliosis viral oncogene homolog A             |
|              | Rfx3    | ENSMUSG00000040929 | regulatory factor X, 3                                           |
|              | Tal1    | ENSMUSG00000028717 | T cell acute lymphocytic leukemia 1                              |
|              | Tfdp2   | ENSMUSG00000032411 | transcription factor Dp 2                                        |
|              | Zbtb26  | ENSMUSG00000050714 | zinc finger and BTB domain containing 26                         |
|              | Zfp113  | ENSMUSG00000037007 | zinc finger protein 113                                          |
|              | Zfp266  | ENSMUSG00000060510 | zinc finger protein 266                                          |
|              | Zfp592  | ENSMUSG00000005621 | zinc finger protein 592                                          |
|              | Zfp672  | ENSMUSG00000049755 | zinc finger protein 672                                          |
|              | Zfp777  | ENSMUSG00000071477 | zinc finger protein 777                                          |
|              | Zik1    | ENSMUSG00000030393 | zinc finger protein interacting with K protein 1                 |
|              | Zkscan1 | ENSMUSG00000029729 | zinc finger with KRAB and SCAN domains 1                         |
| mmu-miR-6366 | Foxm1   | ENSMUSG00000001517 | forkhead box M1                                                  |
|              | Thap3   | ENSMUSG00000039759 | THAP domain containing, apoptosis associated protein 3           |
|              | Zeb1    | ENSMUSG00000024238 | zinc finger E-box binding homeobox 1                             |
